# Supplementary material for: Adipocyte lipid synthesis coupled to neuronal control of thermogenic programming
Source: PubMed Central journal article supplement — Mol Metab. 2017 May 31;6(8):781–96. doi: 10.1016/j.molmet.2017.05.012 (PMC5518709; doi:10.1016/j.molmet.2017.05.012), 2017-05-31
Supplement: mmc1.pdf [file mmc1.pdf]

**A****iWAT**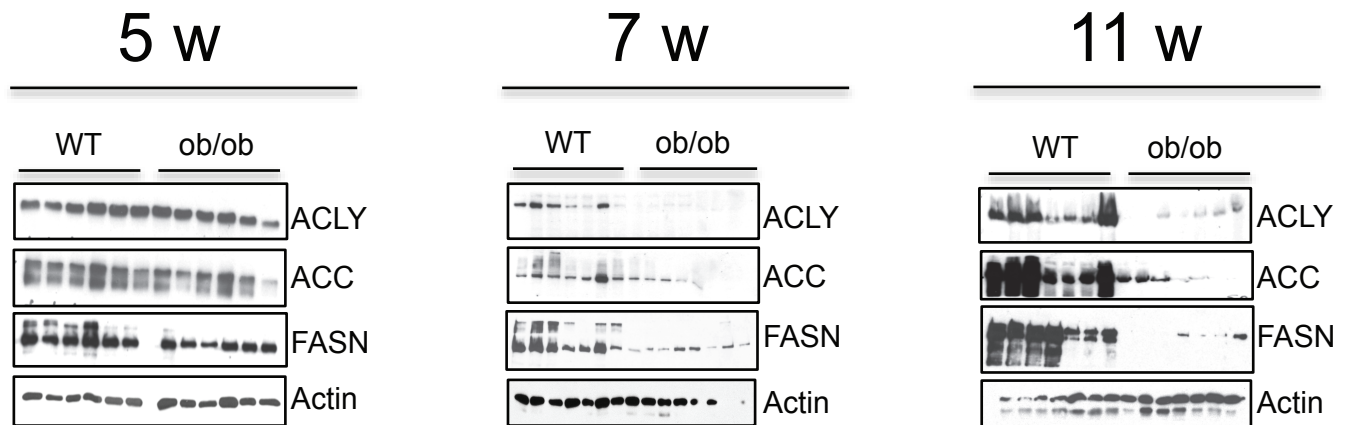**B****Liver**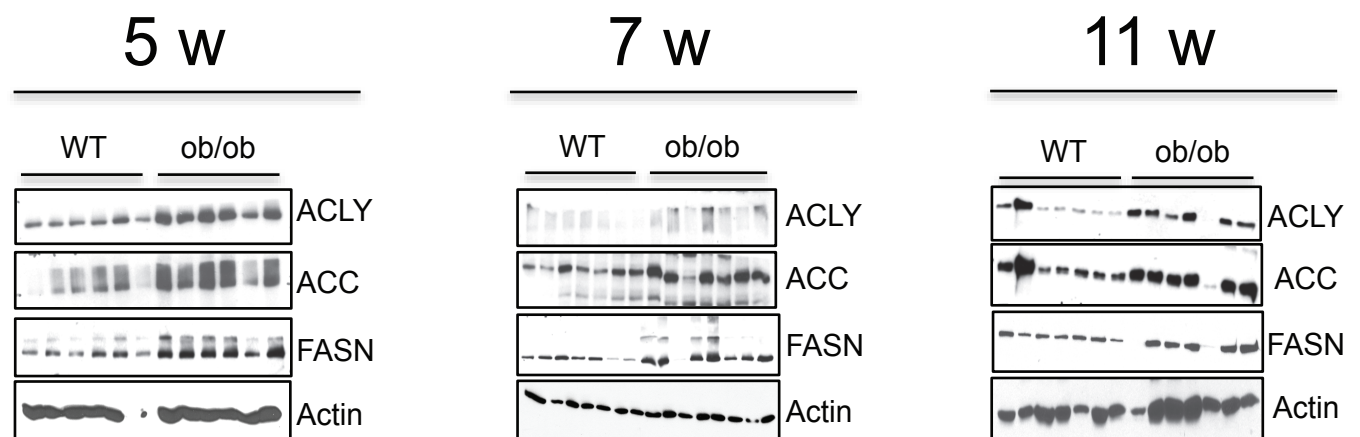

**Supplementary Figure 1:** Shown are the immunoblots used for quantification by densitometry and shown in Figure 1B. Depicted are immunoblots to detect ACLY, FASN and ACC protein levels in iWAT fat (**A**) or liver tissues (**B**) from WT control or ob/ob mice at 5, 7 and 11 weeks of age. N = 4 – 5 mice per group.

# Liver

## p-AKT

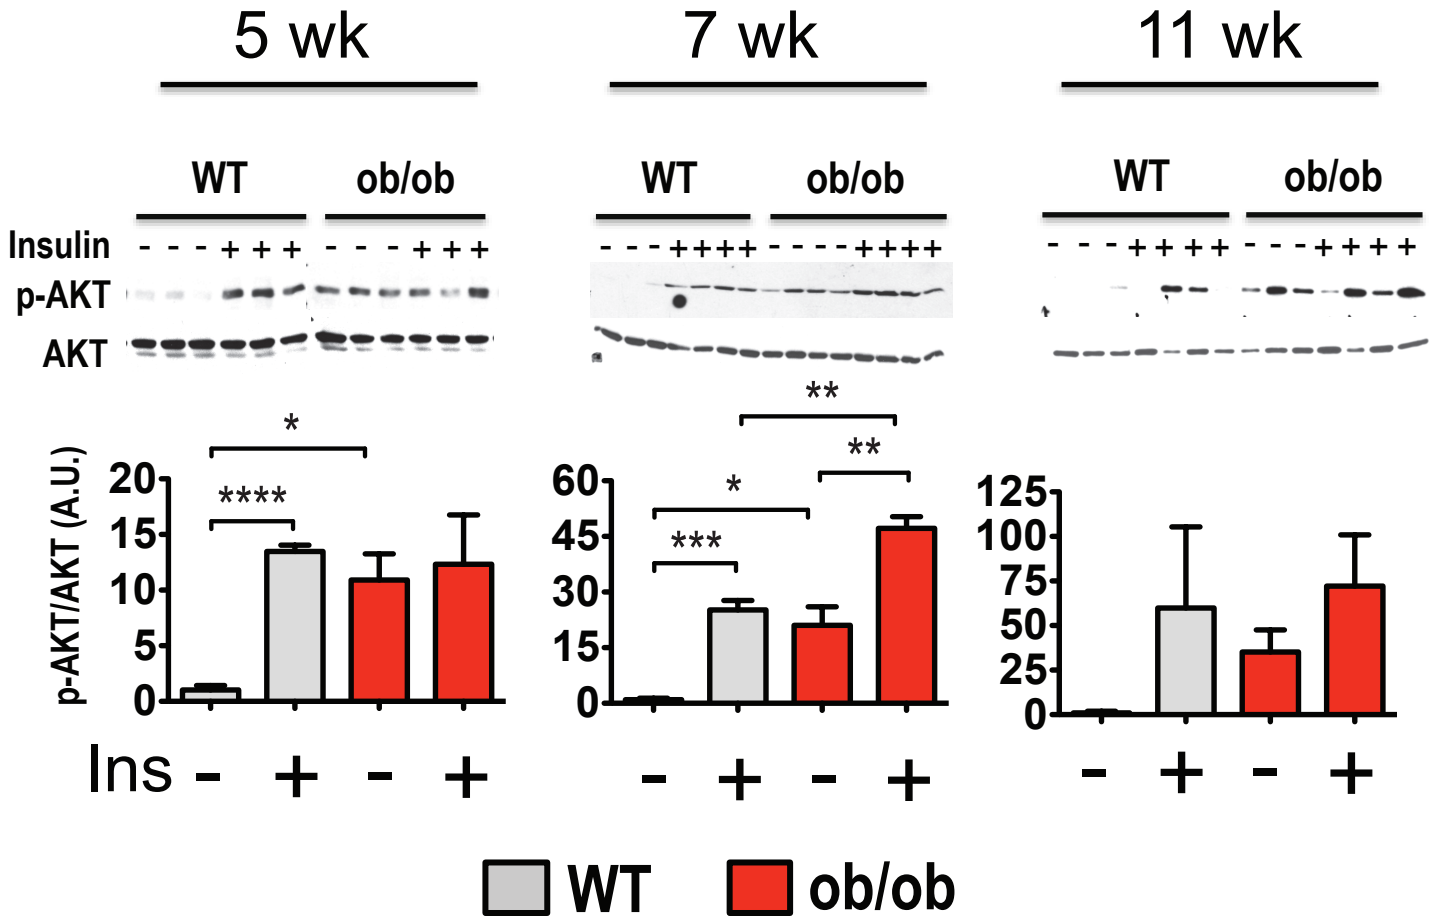

**Supplementary Figure 2:** Representative protein immunoblot of AKT phosphorylation in liver tissue, in response to a bolus insulin injection (1 U/kg). Bottom panels depict densitometry analysis of the data from the Westerns described for top panel (N = 6 or 7). Graphs show the mean  $\pm$  SEM. N = 5 to 7 per group, compared with WT controls, by Student's t test. \* P < 0.05; \*\* P < 0.01; \*\*\* P < 0.001; \*\*\*\* P < 0.0001.

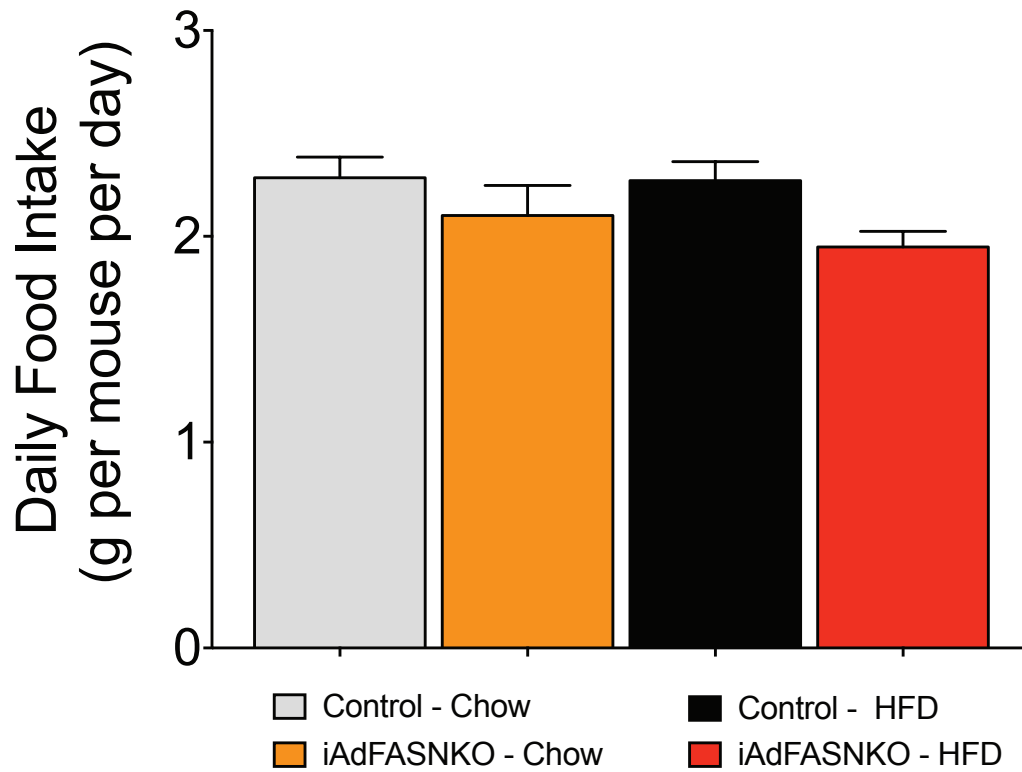

**Supplementary Figure 3:** Food intakes were measured at 3 and 13 weeks post-TAM treatment. Though attenuation of glucose intolerance (**Figure 4G**) was observed, no significant changes in food intake were noted in iAdFASNKO mice. N=4 to 6 mice per group.

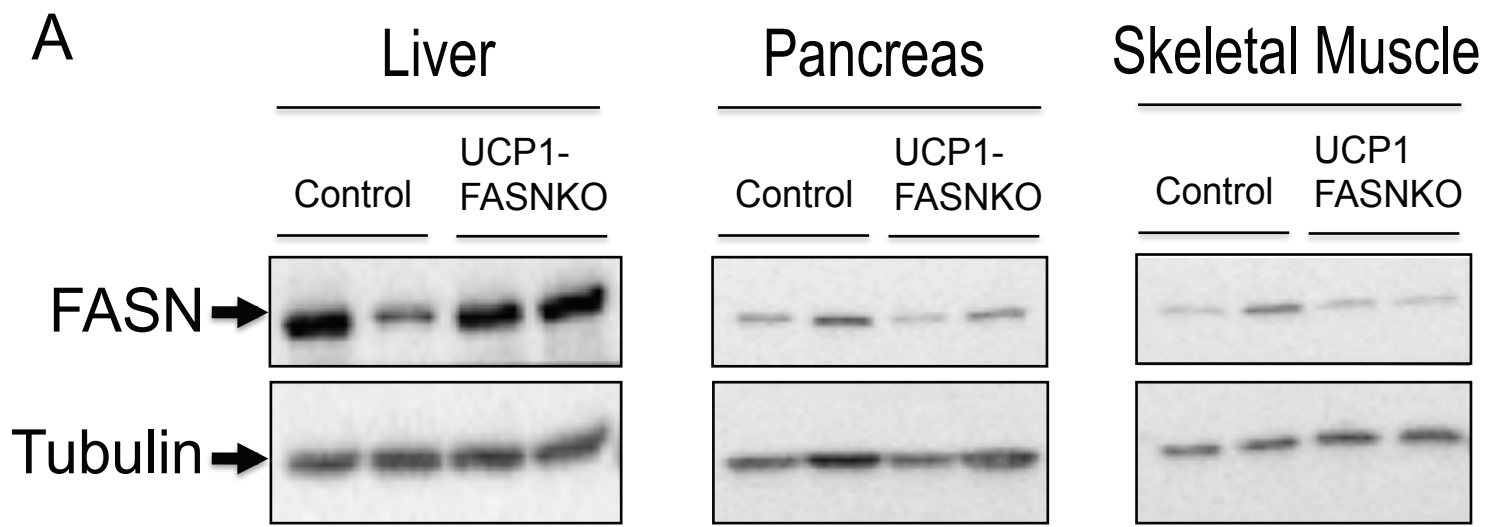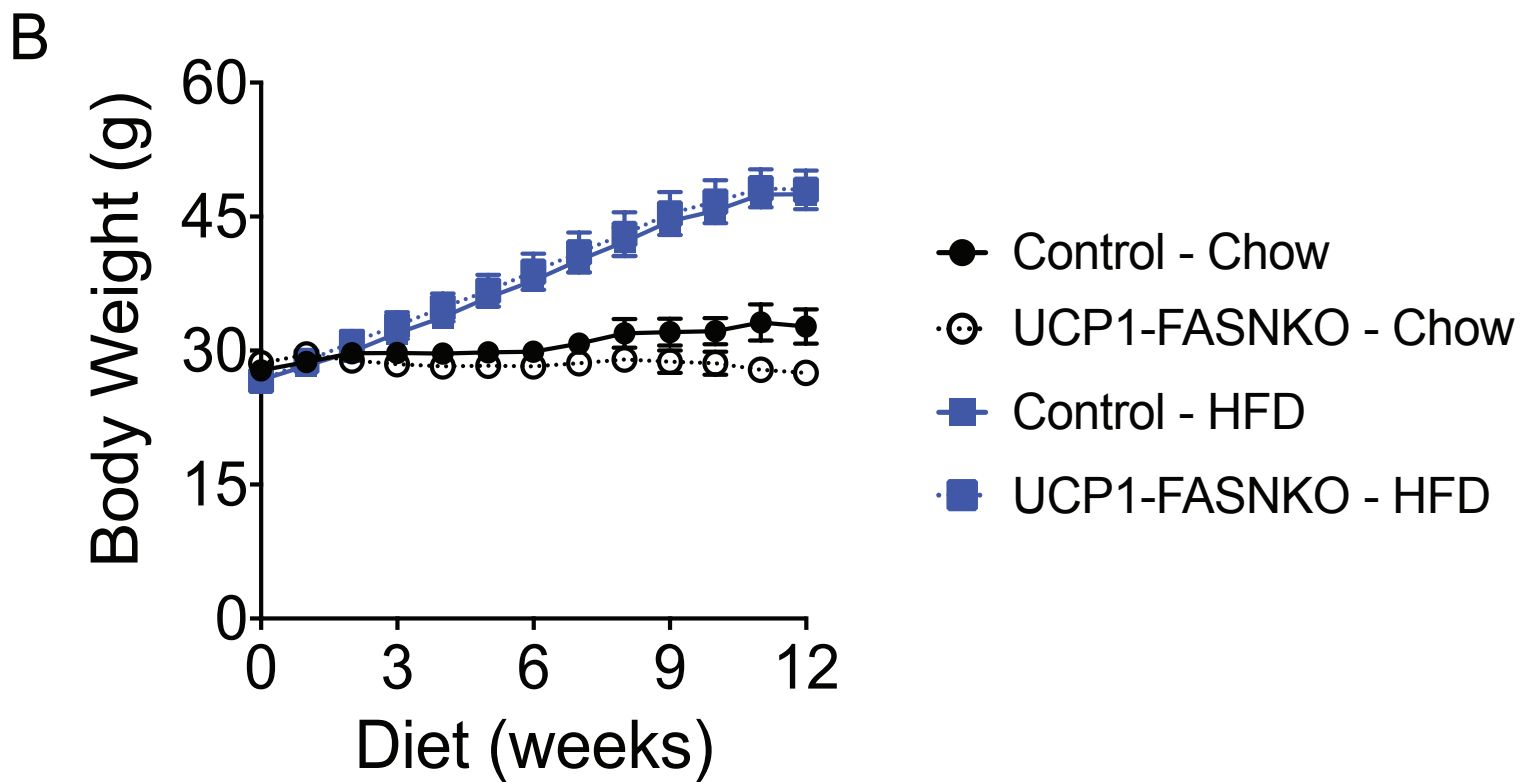

**Supplementary Figure 4: (A)** Liver, pancreas and skeletal muscle tissue lysates from control and UCP1-FASNKO mice were immunoblotted for FASN or tubulin protein as indicated.

**(B)** Body weight gain in control and UCP1-FASNKO mice were fed with chow or HFD for 12 weeks. N = 3-6 mice per group.

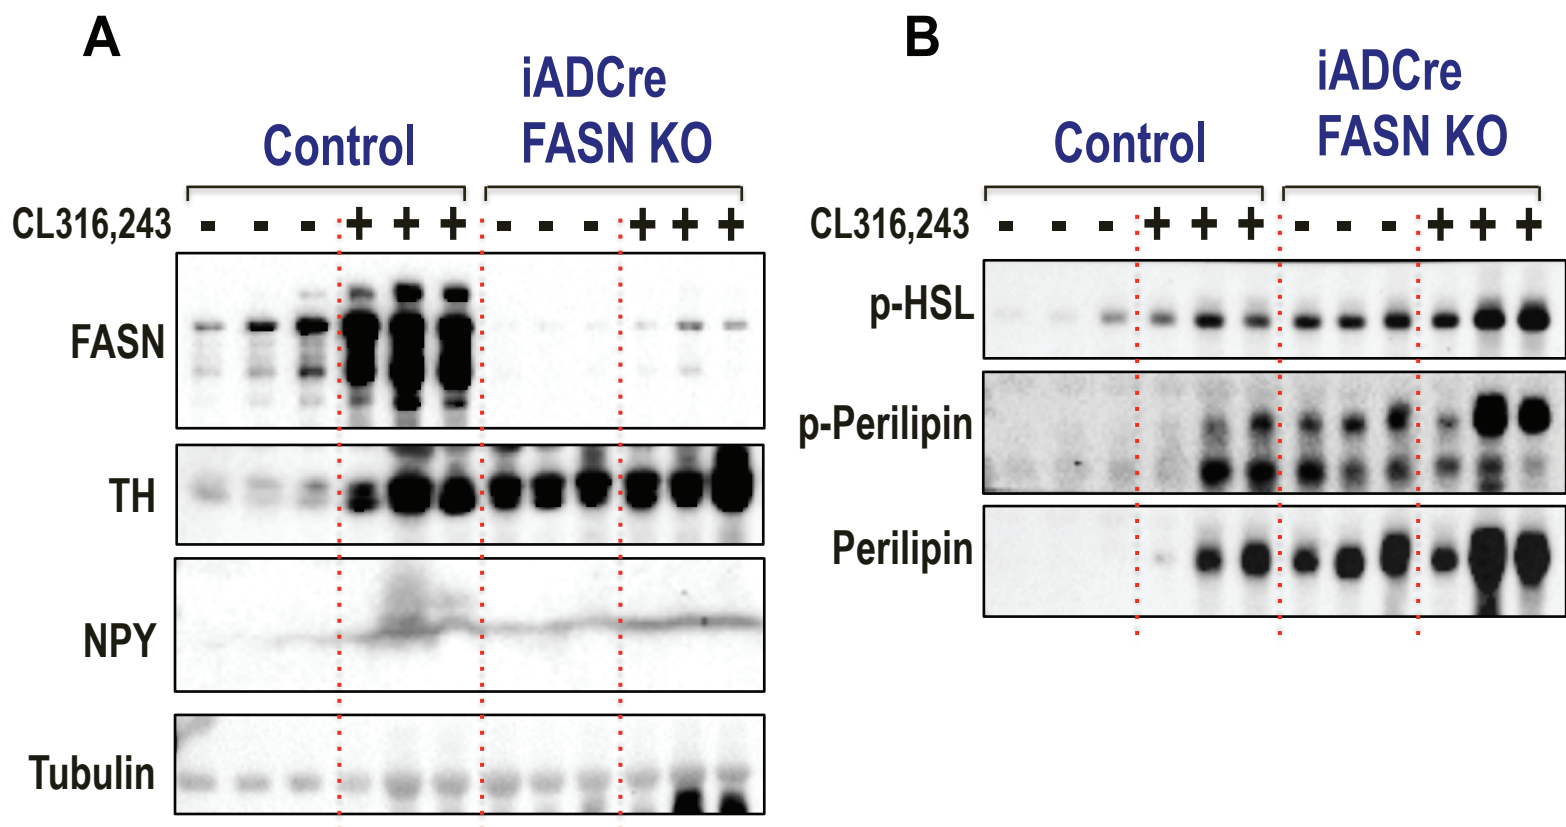

**Supplementary Figure 5:** FASN deletion and  $\beta$ 3-adrenoreceptor stimulation in adipocytes of mature mice increases tyrosine hydroxylase (TH) and neuropeptide Y (NPY) content and activates the PKA signaling pathway in iWAT. Depicted are representative immunoblots to detect FASN, TH, NPY and tubulin (A), phospho-HSL, phospho-perilipin and perilipin (B) levels in iWAT from control, CL316,243-treated mice or iAdFASNKO mice.

| <b>Gene</b>     | <b>Forward</b>          | <b>Reverse</b>           |
|-----------------|-------------------------|--------------------------|
| PPAR $\gamma$ 1 | GACTACCCTTTACTGAAATTACC | GTGGTCTTCCATCACGGAGA     |
| PPAR $\gamma$ 2 | ATGGGTGAAACTCTGGGAG     | GTGGTCTTCCATCACGGAGA     |
| SREBP1c         | GGCCCGGGAAGTCACTGT      | GGAGCCATGGATTGCACATT     |
| SREBP2          | GCAGCAACGGGACCATTCT     | CCCCATGACTAAGTCCTTCAACT  |
| ChREBP $\alpha$ | CGACACTACCCACCTCTTC     | TTGTTCCAGCCGGATCTTGTC    |
| ChREBP $\beta$  | TCTGCAGATCGCGTGGAG      | CTTGTCCCGGCATAGCAAC      |
| FASN            | GGAGGTGGTGATAGCCGGTAT   | TGGGTAATCCATAGAGCCCAG    |
| ELOVL6          | TCAGCAAAGCACCCGAAC      | AGCGACCATGTCTTTGTAGGAG   |
| ACLY            | ACCCTTTCACTGGGGATCACA   | GACAGGGATCAGGTATTCTTG    |
| SCD1            | TTCTTGCGATACTCTGGTGC    | CGGGATTGAATGTTCTTGTCG    |
| GLUT4           | GTGACTGGAACACTGGTCCTA   | CCAGCCACGTTGCATTGTAG     |
| PEPCK           | CTGCATAACGGTCTGGACTTC   | CAGCAACTGCCCGTACTCC      |
| DGAT2           | GCGTACTTCCGAGACTACTT    | GGCCTTATGCCAGGAAACT      |
| PDK4            | AGGGAGGTCGAGCTGTTCTC    | GGAGTGTTCACTAAGCGGTCA    |
| ACC1            | TGTACAAGCAGTGTGGGCTGGCT | CCACATGGCCTGGCTTGGAGGG   |
| ACC2            | GGAGGCTGCATTGAACACAAGT  | TGCCTCAAAGCGAGTGACAAA    |
| ME1             | ATCACTTTGGATGTGGGAACAG  | CAGGAAGGCGTCATACTCAGG    |
| MDH1            | AAGGCATGGAGAGGAAGGAC    | AGTTCGTATTGGCTGGGTTTC    |
| UCP1            | ACTGCCACACCTCCAGTCATT   | CTTGCCTCACTCAGGATTGG     |
| CIDEA           | ATCACAACGGCCTGGTTACG    | TACTACCCGGTGTCCATTTCT    |
| PGC1 $\alpha$   | AGCCGTGACCACTGACAACGAG  | GCTGCATGGTTCTGAGTGCTAAG  |
| PRDM16          | CAGCACGGTGAAGCCATTC     | GCGTGCA TCCGCTTGTC       |
| PPAR $\alpha$   | TATGGAGTGACATAGAGTGTGCT | CCACTTCAATCCACCCAGAAAG   |
| ELOVL3          | TTCTCACGCGGGTTAAAAATGG  | GAGCAACAGATAGACGACCAC    |
| TH              | GTCTCAGAGCAGGATACCAAGC  | CTCTCCTCGAATACCACAGCC    |
| 36B4            | TCCAGGCTTTGGGCATCA      | CTTATCAGCTGCACATCACTCAGA |
| HPRT            | TCAGTCAACGGGGGACATAAA   | TCAGTCAACGGGGGACATAAA    |
| GAPDH           | AGGTCGGTGTGAACGGATTTG   | TGTAGACCATGTAGTTGAGGTCA  |

**Supplementary Table 1: Primer sequences used in qRT-PCR analysis**
